# Supplementary material
Source: PubMed Central journal article supplement (PMC6761732)
Supplement: DS_10.1177_0022034511416668.pdf [file DS_10.1177_0022034511416668.pdf]

## RESEARCH REPORTS

Clinical

R.M. Cruz<sup>1,2</sup>, J.K. Hartsfield, Jr.<sup>3,5</sup>,  
G. Falcão-Alencar<sup>1,4</sup>, D.L. Koller<sup>5</sup>, R.W. Pereira<sup>6</sup>,  
J. Mah<sup>7</sup>, I. Ferrari<sup>1</sup>, and S.F. Oliveira<sup>1\*</sup>

<sup>1</sup>Laboratório de Genética, Departamento de Genética e Morfologia, Campus Darcy Ribeiro, Universidade de Brasília, Asa Norte, CEP 70910900 Brasília, DF, Brazil; <sup>2</sup>Universidade Paulista (UNIP), Brasília, DF, Brazil; <sup>3</sup>Department of Oral Health Science, College of Dentistry, University of Kentucky, Lexington, KY, USA; <sup>4</sup>Programa de Pós-Graduação em Ciências Médicas, Faculdade de Medicina, Universidade de Brasília, Brasília, DF, Brazil; <sup>5</sup>Department of Medical and Molecular Genetics, Indiana University School of Medicine, Indianapolis, IN, USA; <sup>6</sup>Programa de Pós-Graduação em Ciências Genômicas e Biotecnologia, Universidade Católica de Brasília, Brasília, DF, Brazil; and <sup>7</sup>Department of Orthodontics and Craniofacial Molecular Biology, University of Southern California, Los Angeles, CA, USA; \*corresponding author, silviene.oliveira@gmail.com.br or silviene@unb.br

*J Dent Res* DOI: 10.1177/0022034511416668

### APPENDIX

# Exclusion of Class III Malocclusion Candidate Loci in Brazilian Families

**Appendix Table 1.** Cephalometric Measurements in Each Family

| Family | Age    | Gender | SNA | SNB | ANB | Pos-ANS | Go-Gn | SNGoGn | Gon. Angle |
|--------|--------|--------|-----|-----|-----|---------|-------|--------|------------|
| 1*     | 47y11m | Male   | 83  | 83  | 0   | 105     | 102   | 44     | 135        |
| 1      | 36y3m  | Female | 83  | 84  | -1  | 86      | 86    | 36     | 142        |
| 1      | 15y2m  | Female | 79  | 79  | 0   | 82      | 85    | 41     | 137        |
| 1      | 12y1m  | Female | 80  | 77  | 3   | 85      | 88    | 50     | 145        |
| 1      | 4y10m  | Female | 78  | 78  | 0   | 74      | 65    | 34     | 132        |
| 1      | 9y1m   | Male   | 75  | 77  | -2  | 77      | 78    | 42     | 133        |
| 2      | 55y11m | Female | 80  | 82  | -2  | 85      | 87    | 41     | 136        |
| 2*     | 29y10m | Female | 85  | 86  | -1  | 91      | 92    | 40     | 138        |
| 3      | 42y3m  | Male   | 86  | 87  | -1  | 100     | 94    | 29     | 135        |
| 3      | 6y9m   | Male   | 85  | 86  | -1  | 90      | 80    | 27     | 133        |
| 4      | 80y0m  | Male   | 80  | 86  | -6  | 90      | 87    | 27     | 130        |
| 4      | 55y11m | Female | 87  | 90  | -3  | 88      | 85    | 25     | 129        |
| 4      | 39y2m  | Female | 83  | 86  | -3  | 89      | 85    | 24     | 131        |
| 4      | 11y2m  | Female | 80  | 81  | -1  | 84      | 78    | 37     | 135        |
| 5      | 72y0m  | Male   | 83  | 85  | -2  | 86      | 85    | 32     | 133        |
| 5      | 45y7m  | Male   | 82  | 84  | -2  | 97      | 89    | 31     | 136        |
| 5      | 27y10m | Female | 78  | 79  | -1  | 82      | 80    | 35     | 127        |
| 5      | 12y9m  | Female | 78  | 81  | -3  | 78      | 78    | 35     | 130        |
| 6      | 54y2m  | Female | 74  | 75  | -1  | 79      | 79    | 39     | 125        |
| 6      | 19y1m  | Male   | 82  | 83  | -1  | 92      | 84    | 36     | 130        |
| 6      | 16y5m  | Male   | 77  | 73  | 4   | 82      | 77    | 49     | 134        |
| 7      | 44y10m | Male   | 91  | 94  | -3  | 104     | 83    | 13     | 130        |
| 7      | 19y6m  | Male   | 79  | 81  | -2  | 98      | 89    | 32     | 126        |
| 7*     | 23y6m  | Male   | 82  | 84  | -2  | 97      | 82    | 32     | 137        |
| 8      | 38y11m | Male   | 81  | 84  | -3  | 94      | 92    | 35     | 137        |
| 8      | 36y11m | Female | 80  | 82  | -2  | 85      | 81    | 39     | 137        |
| 8      | 39y2m  | Female | 81  | 83  | -2  | 85      | 75    | 38     | 136        |
| 8      | 16y0m  | Female | 81  | 81  | 0   | 93      | 81    | 35     | 131        |
| 8      | 27y4m  | Male   | 82  | 84  | -2  | 87      | 80    | 34     | 132        |
| 8      | 16y11m | Female | 78  | 77  | -1  | 84      | 77    | 25     | 125        |
| 8      | 13y7m  | Female | 78  | 78  | 0   | 82      | 82    | 45     | 135        |
| 9      | 39y9,  | Male   | 75  | 77  | -2  | 94      | 93    | 39     | 136        |
| 9      | 38y9m  | Female | 77  | 77  | 0   | 81      | 78    | 44     | 134        |
| 9      | 17y11m | Male   | 85  | 88  | -3  | 93      | 92    | 32     | 134        |
| 9      | 16y10m | Male   | 78  | 80  | -2  | 89      | 82    | 37     | 129        |
| 10     | 56y6m  | Male   | 86  | 89  | -3  | 90      | 84    | 24     | 134        |
| 10     | 48y6m  | Female | 80  | 81  | -1  | 85      | 77    | 37     | 135        |
| 10     | 58y3m  | Female | 76  | 77  | -1  | 85      | 70    | 43     | 144        |
| 10     | 58y3m  | Female | 81  | 81  | 0   | 90      | 80    | 41     | 148        |
| 10     | 25y4m  | Female | 76  | 79  | -3  | 82      | 81    | 32     | 129        |
| 10     | 21y4m  | Male   | 82  | 85  | -3  | 89      | 92    | 30     | 125        |
| 10     | 19y8m  | Male   | 83  | 85  | -2  | 90      | 94    | 31     | 128        |

\*Records after orthognathic surgery.

**Appendix Table 2.** Values of LOD Score Estimated to D1S234 for Each Brazilian Family

| D1S234    | $\theta$ Values |       |       |       |       |       |       |
|-----------|-----------------|-------|-------|-------|-------|-------|-------|
|           | 0.00            | 0.01  | 0.05  | 0.10  | 0.20  | 0.30  | 0.40  |
| Family 01 | -1.92           | -0.91 | -0.32 | -0.11 | 0.01  | 0.02  | 0.01  |
| Family 02 | 0.00            | 0.00  | 0.00  | 0.00  | 0.00  | 0.00  | 0.00  |
| Family 03 | 0.01            | 0.01  | 0.01  | 0.01  | 0.01  | 0.00  | 0.00  |
| Family 04 | -2.40           | -2.32 | -1.64 | -1.12 | -0.59 | -0.30 | -0.11 |
| Family 05 | -0.27           | -0.26 | -0.22 | -0.18 | -0.11 | -0.07 | -0.03 |
| Family 06 | -2.63           | -1.38 | -0.72 | -0.44 | -0.19 | -0.08 | -0.02 |
| Family 07 | -2.40           | -1.36 | -0.71 | -0.44 | -0.19 | -0.08 | -0.02 |
| Family 08 | -6.20           | -2.78 | -1.45 | -0.91 | -0.41 | -0.17 | -0.04 |
| Family 09 | -0.05           | -0.05 | -0.05 | -0.06 | -0.07 | -0.06 | -0.04 |
| Family 10 | 0.02            | 0.01  | -0.01 | -0.03 | -0.03 | -0.02 | -0.01 |

**Appendix Table 3.** Values of LOD Score Estimated to D4S3038 for Each Brazilian Family

| D4S3038   | $\theta$ Values |       |       |       |       |       |       |
|-----------|-----------------|-------|-------|-------|-------|-------|-------|
|           | 0.00            | 0.01  | 0.05  | 0.10  | 0.20  | 0.30  | 0.40  |
| Family 01 | 0.65            | 0.63  | 0.56  | 0.46  | 0.28  | 0.13  | 0.03  |
| Family 02 | 0.00            | 0.00  | 0.00  | 0.00  | 0.00  | 0.00  | 0.00  |
| Family 03 | -0.01           | -0.01 | -0.01 | -0.01 | -0.01 | 0.00  | 0.00  |
| Family 04 | 0.12            | 0.12  | 0.11  | 0.10  | 0.08  | 0.05  | 0.03  |
| Family 05 | -0.74           | -0.71 | -0.60 | -0.49 | -0.32 | -0.18 | -0.08 |
| Family 06 | 0.00            | 0.00  | 0.00  | 0.00  | 0.00  | 0.00  | 0.00  |
| Family 07 | 0.30            | 0.29  | 0.26  | 0.21  | 0.13  | 0.06  | 0.02  |
| Family 08 | -2.01           | -0.72 | -0.14 | 0.03  | 0.09  | 0.04  | 0.01  |
| Family 09 | 0.07            | 0.07  | 0.05  | 0.03  | 0.00  | -0.02 | -0.02 |
| Family 10 | 0.17            | 0.16  | 0.13  | 0.10  | 0.06  | 0.03  | 0.01  |

**Appendix Table 4.** Values of LOD Score Estimated to D6S1689 for Each Brazilian Family

| D6S1689   | $\theta$ Values |       |       |       |       |       |       |
|-----------|-----------------|-------|-------|-------|-------|-------|-------|
|           | 0.00            | 0.01  | 0.05  | 0.10  | 0.20  | 0.30  | 0.40  |
| Family 01 | -5.08           | -2.82 | -1.50 | -0.94 | -0.41 | -0.16 | -0.04 |
| Family 02 | 0.00            | 0.00  | 0.00  | 0.00  | 0.00  | 0.00  | 0.00  |
| Family 03 | 0.03            | 0.03  | 0.04  | 0.04  | 0.03  | 0.02  | 0.01  |
| Family 04 | 0.71            | 0.69  | 0.62  | 0.54  | 0.36  | 0.20  | 0.06  |
| Family 05 | 0.23            | 0.23  | 0.22  | 0.21  | 0.18  | 0.13  | 0.07  |
| Family 06 | 0.00            | 0.00  | 0.00  | 0.00  | 0.00  | 0.00  | 0.00  |
| Family 07 | 0.30            | 0.29  | 0.26  | 0.21  | 0.13  | 0.06  | 0.02  |
| Family 08 | -3.55           | -2.27 | -1.11 | -0.61 | -0.21 | -0.05 | -0.01 |
| Family 09 | 0.57            | 0.55  | 0.50  | 0.44  | 0.32  | 0.20  | 0.09  |
| Family 10 | -0.26           | -0.24 | -0.19 | -0.13 | -0.06 | -0.02 | 0.00  |

**Appendix Table 5.** Values of LOD Score Estimated to D7S503 for Each Brazilian Family

| D7S503    | $\theta$ Values |       |       |       |       |       |       |
|-----------|-----------------|-------|-------|-------|-------|-------|-------|
|           | 0.00            | 0.01  | 0.05  | 0.10  | 0.20  | 0.30  | 0.40  |
| Family 01 | -1.88           | -0.87 | -0.28 | -0.08 | 0.03  | 0.03  | 0.01  |
| Family 02 | 0.00            | 0.00  | 0.00  | 0.00  | 0.00  | 0.00  | 0.00  |
| Family 03 | 0.02            | 0.02  | 0.03  | 0.03  | 0.02  | 0.01  | 0.00  |
| Family 04 | -2.21           | -1.24 | -0.61 | -0.36 | -0.15 | -0.07 | -0.03 |
| Family 05 | -0.46           | -0.42 | -0.30 | -0.21 | -0.09 | -0.03 | -0.01 |
| Family 06 | 0.30            | 0.29  | 0.26  | 0.21  | 0.13  | 0.06  | 0.02  |
| Family 07 | 0.30            | 0.29  | 0.26  | 0.21  | 0.13  | 0.06  | 0.02  |
| Family 08 | -3.77           | -1.05 | -0.42 | -0.21 | -0.06 | -0.02 | 0.00  |
| Family 09 | 0.36            | 0.35  | 0.31  | 0.27  | 0.18  | 0.11  | 0.05  |
| Family 10 | -1.60           | -1.15 | -0.62 | -0.38 | -0.16 | -0.66 | -0.01 |

**Appendix Table 6.** Values of LOD Score Estimated to D10S1483 for Each Brazilian Family

| D10S1483  | θ Values |       |       |       |       |       |       |
|-----------|----------|-------|-------|-------|-------|-------|-------|
|           | 0.00     | 0.01  | 0.05  | 0.10  | 0.20  | 0.30  | 0.40  |
| Family 01 | -4.10    | -0.98 | -0.34 | -0.11 | 0.03  | 0.05  | 0.02  |
| Family 02 | 0.00     | 0.00  | 0.00  | 0.00  | 0.00  | 0.00  | 0.00  |
| Family 03 | 0.03     | 0.03  | 0.04  | 0.04  | 0.03  | 0.02  | 0.01  |
| Family 04 | -0.50    | -0.49 | -0.43 | -0.36 | -0.23 | -0.13 | -0.05 |
| Family 05 | 0.10     | 0.10  | 0.08  | 0.06  | 0.03  | 0.01  | 0.00  |
| Family 06 | 0.00     | 0.00  | 0.00  | 0.00  | 0.00  | 0.00  | 0.00  |
| Family 07 | 0.00     | 0.00  | 0.00  | 0.00  | 0.00  | 0.00  | 0.00  |
| Family 08 | -4.11    | -1.38 | -0.68 | -0.40 | -0.16 | -0.06 | -0.02 |
| Family 09 | 0.55     | 0.54  | 0.49  | 0.43  | 0.31  | 0.19  | 0.09  |
| Family 10 | 0.30     | 0.28  | 0.21  | 0.14  | 0.05  | 0.02  | 0.01  |

**Appendix Table 7.** Values of LOD Score Estimated to D19S566 for Each Brazilian Family

| D19S566   | θ Values |       |       |       |       |       |       |
|-----------|----------|-------|-------|-------|-------|-------|-------|
|           | 0.00     | 0.01  | 0.05  | 0.10  | 0.20  | 0.30  | 0.40  |
| Family 01 | 0.64     | 0.62  | 0.55  | 0.46  | 0.29  | 0.14  | 0.04  |
| Family 02 | 0.00     | 0.00  | 0.00  | 0.00  | 0.00  | 0.00  | 0.00  |
| Family 03 | 0.02     | 0.02  | 0.03  | 0.03  | 0.02  | 0.01  | 0.00  |
| Family 04 | -2.50    | -1.16 | -0.50 | -0.25 | -0.04 | 0.03  | 0.04  |
| Family 05 | -0.34    | -0.33 | -0.28 | -0.24 | -0.17 | -0.11 | -0.05 |
| Family 06 | -1.37    | -1.10 | -0.65 | -0.41 | -0.18 | -0.07 | -0.02 |
| Family 07 | 0.30     | 0.29  | 0.26  | 0.21  | 0.13  | 0.06  | 0.02  |
| Family 08 | -2.04    | -0.80 | -0.22 | -0.04 | 0.02  | 0.01  | 0.00  |
| Family 09 | -2.21    | -1.08 | -0.46 | -0.23 | -0.06 | -0.01 | 0.00  |
| Family 10 | -1.71    | -1.19 | -0.65 | -0.42 | -0.20 | -0.09 | 0.02  |

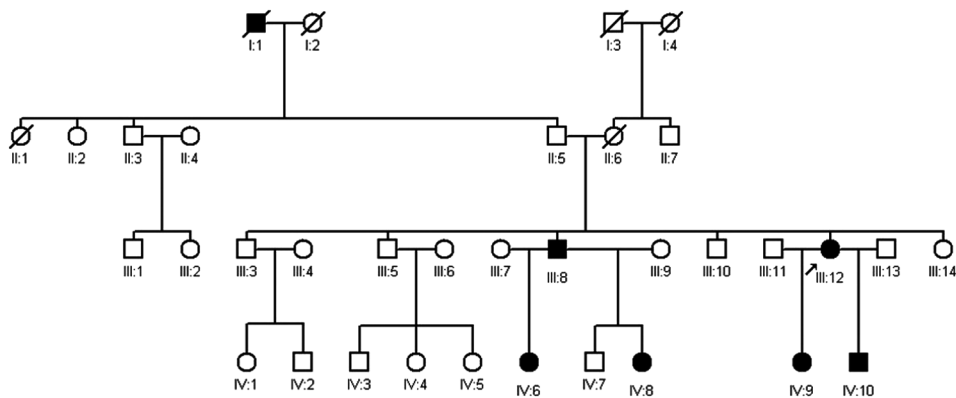

**Appendix Figure 1.** Family 01. Pedigree of Brazilian family 01 with Class III malocclusion.

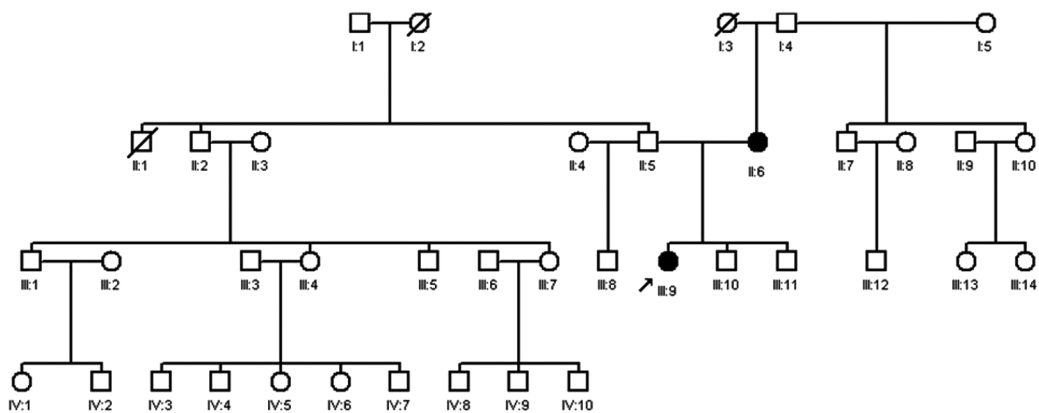

Appendix Figure 2. Family 02. Pedigree of Brazilian family 02 with Class III malocclusion.

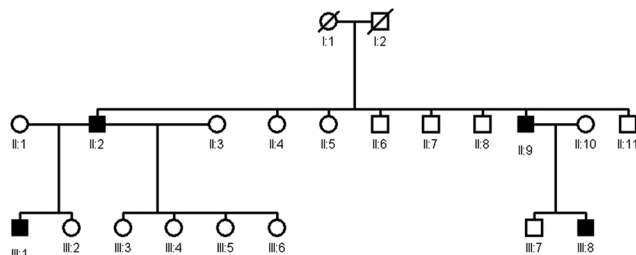

Appendix Figure 3. Family 03. Pedigree of Brazilian family 03 with Class III malocclusion.

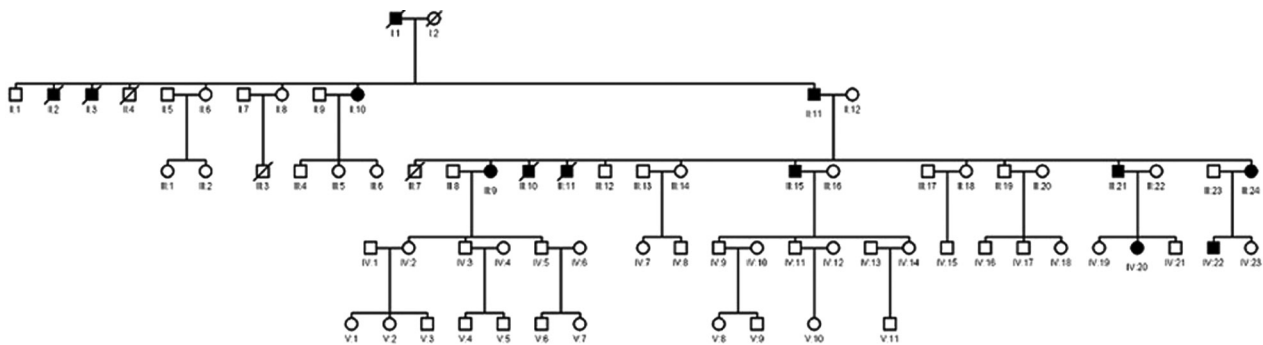

Appendix Figure 4. Family 04. Pedigree of Brazilian family 04 with Class III malocclusion.

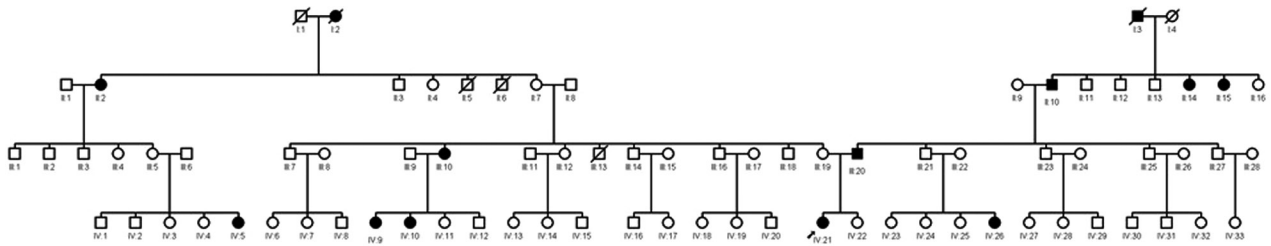

Appendix Figure 5. Family 05. Pedigree of Brazilian family 05 with Class III malocclusion.

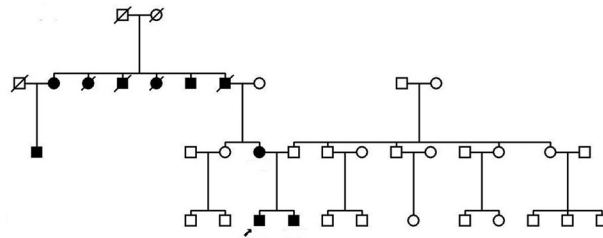

Appendix Figure 6. Family 06. Pedigree of Brazilian family 06 with Class III malocclusion.

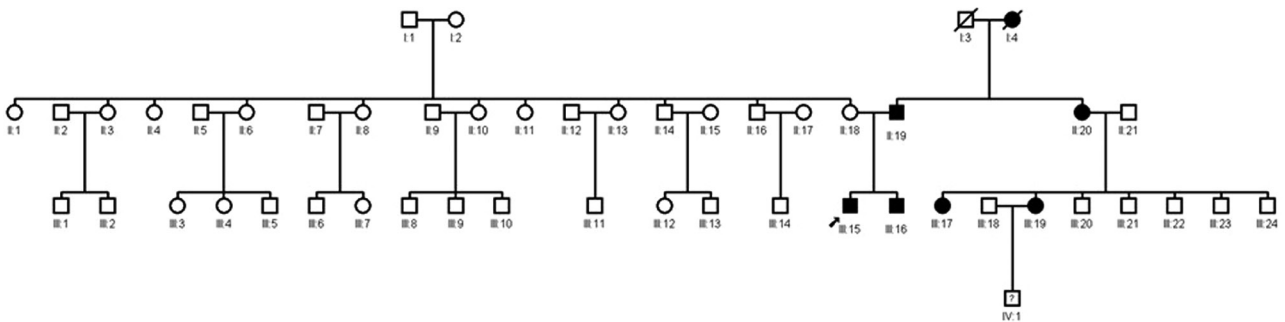

Appendix Figure 7. Family 07. Pedigree of Brazilian family 07 with Class III malocclusion.

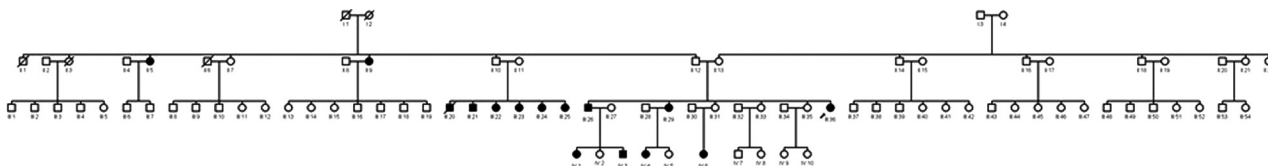

Appendix Figure 8. Family 08. Pedigree of Brazilian family 08 with Class III malocclusion.

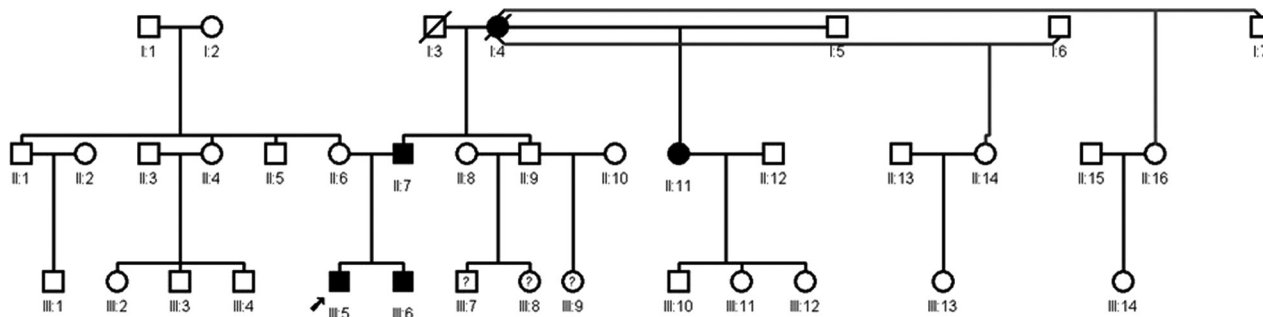

Appendix Figure 9. Family 09. Pedigree of Brazilian family 09 with Class III malocclusion.

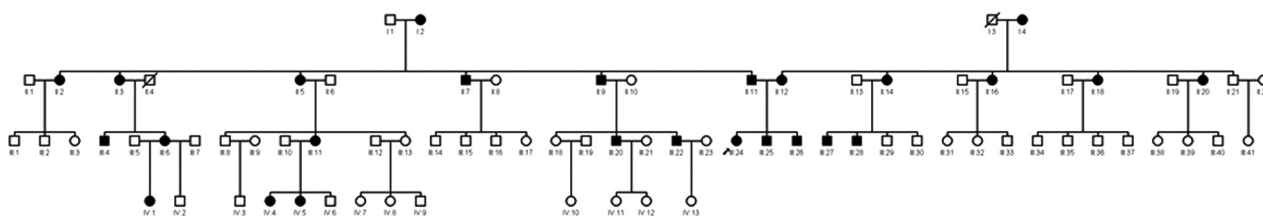

Appendix Figure 10. Family 10. Pedigree of Brazilian family 10 with Class III malocclusion
